# Supplementary material for: A Novel Method for the Determination of Vitamin D Metabolites Assessed at the Blood-Cerebrospinal Fluid Barrier
Source: MDPI journal article supplement (doi:10.3390/biom11091288), 2021-08-29
Supplement: s1 [file s1]

## Supplementary material

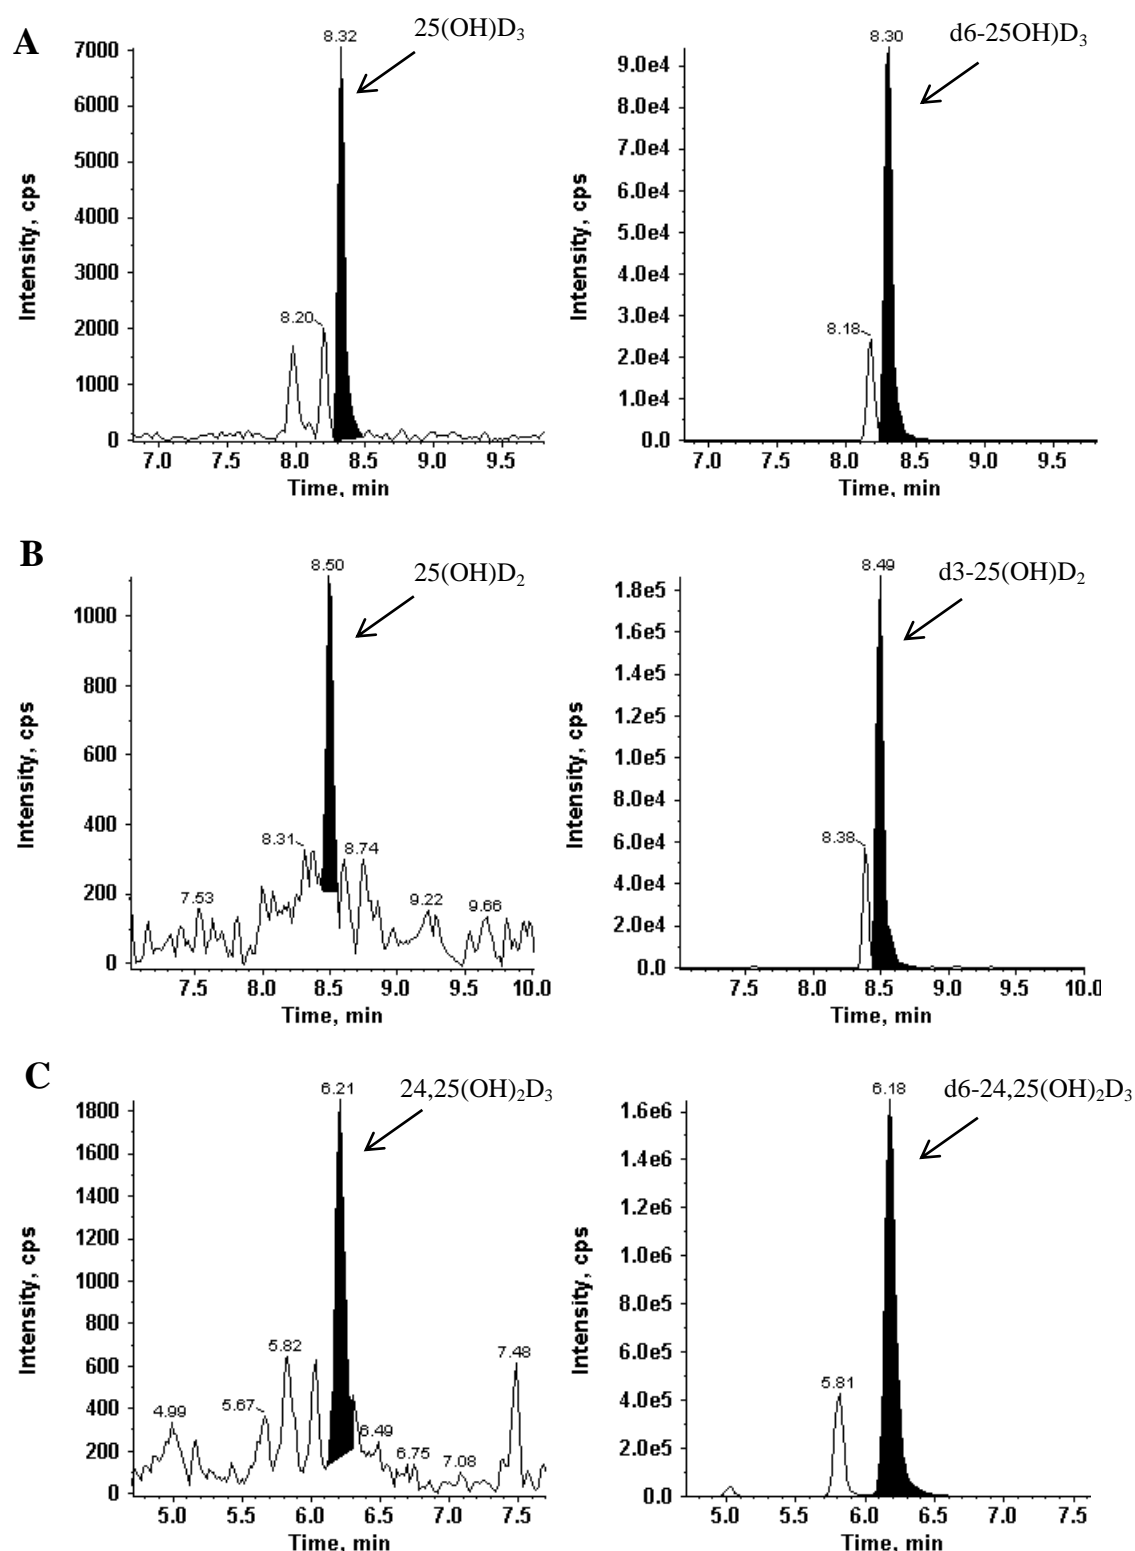

**Figure S1.** Representative chromatograms of (A)  $25(\text{OH})\text{D}_3$  (2.6 nmol/L), (B)  $25(\text{OH})\text{D}_2$  (0.9 nmol/L) and (C)  $24,25(\text{OH})_2\text{D}_3$  (0.07 nmol/L) (on the left side), in a native liquor sample and their deuterated internal standards ( $\text{d6-}25(\text{OH})\text{D}_3$ ,  $\text{d3-}25(\text{OH})\text{D}_2$  and  $\text{d6-}24,25(\text{OH})_2\text{D}_3$  each with 150 nmol/L) (on the right side) obtained by LC-MS/MS in multiple reaction monitoring (MRM) mode. The black coloured peak represents the target analyte in the chromatograms. cps, counts per second
